# Supplementary material
Source: PubMed Central journal article supplement (PMC7672535)
Supplement: kxy078_supplementary_materials.pdf [file kxy078_supplementary_materials.pdf]

## Bayesian Inference of Networks Across Multiple Sample Groups and Data Types Supplementary Materials

ELIN SHADDOX\*, CHRISTINE B PETERSON, FRANCESCO C STINGO, NICOLA A. HANANIA,  
CHARMION CRUICKSHANK-QUINN, KATERINA KECHRIS, RUSSELL BOWLER, MARINA  
VANNUCCI\*

<sup>1</sup>*Department of Statistics, Rice University, Houston, TX, USA*

<sup>2</sup>*Department of Biostatistics, UT MD Anderson Cancer Center, Houston, TX, USA*

<sup>3</sup>*Department of Statistics, Computer Science, Applications “G. Parenti”, University of Florence,  
Florence, Italy*

<sup>4</sup>*Department of Medicine-Pulmonary, Baylor College of Medicine, Houston, TX, USA*

<sup>5</sup>*Department of Pharmaceutical Sciences, School of Pharmacy, University of Colorado, Denver, CO,  
USA*

<sup>6</sup>*Department of Biostatistics and Informatics, Colorado SPH, University of Colorado, Denver, CO, USA*

<sup>7</sup>*Department of Medicine, National Jewish Health, Denver, CO, USA*

elin@rice.edu, marina@rice.edu

### APPENDIX A: DETAILS ON MCMC ALGORITHM FOR POSTERIOR INFERENCE

**Updating  $\Omega_{sk}$ :** To sample  $\Omega_{sk}$ , we rely on the block Gibbs sampler proposed in Wang (2015). For simplicity, assume each group’s data is column centered. The likelihood for each group is then

$$\mathbf{X}_{sk} \sim N(0, \Omega_{sk}^{-1}) \text{ where } s = 1, \dots, S \text{ and } k = 1, \dots, K$$

For the posterior full conditional of  $\Omega_{sk}$ ,

$$P(\Omega_{sk} | \mathbf{X}_{sk}, \mathbf{G}_{sk}) \propto |\Omega_{sk}|^{n_{sk}/2} \exp\{-tr(\mathbf{X}_{sk}^T \mathbf{X}_{sk} \Omega_{sk})\} \times \prod_{i < j} \left\{ \exp\left(\frac{\omega_{skij}^2}{2\nu_{gskij}^2}\right) \right\} \prod_{i=1}^P \left\{ \exp\left(-\frac{\lambda}{2} \omega_{skii}\right) \right\}$$

\*To whom correspondence should be addressed.

Partitioning  $\mathbf{\Omega}_{sk}$  into  $\mathbf{V} = (v_{ij}^2)$  a  $p \times p$  symmetric matrix with zeroed diagonal entries and  $(v_{ij}^2)_{i < j}$  in the upper diagonal entries where  $\mathbf{S} = \mathbf{X}_{sk}^T \mathbf{X}_{sk}$  we can focus on the last column and row to acquire

$$\mathbf{\Omega} = \begin{pmatrix} \mathbf{\Omega}_{1,1} & \boldsymbol{\omega}_{1,2} \\ \boldsymbol{\omega}'_{1,2} & \omega_{2,2} \end{pmatrix}, \quad \mathbf{S} = \begin{pmatrix} \mathbf{S}_{1,1} & \mathbf{s}_{1,2} \\ \mathbf{s}'_{1,2} & s_{2,2} \end{pmatrix}, \quad \mathbf{V} = \begin{pmatrix} \mathbf{V}_{1,1} & \mathbf{v}_{1,2} \\ \mathbf{v}'_{1,2} & 0 \end{pmatrix}.$$

Then the conditional distribution of the last column in  $\mathbf{\Omega}_{sk}$  is

$$P(\boldsymbol{\omega}_{12}, \omega_{22} | \mathbf{X}_{sk}, \mathbf{G}_{sk}, \mathbf{\Omega}_{11}) \propto (\omega_{22} - \boldsymbol{\omega}'_{12} \mathbf{\Omega}_{11}^{-1} \boldsymbol{\omega}_{12})^{n_{sk}/2} \exp \left[ -\frac{1}{2} \left\{ \boldsymbol{\omega}'_{12} D^{-1} \boldsymbol{\omega}_{12} + 2 \mathbf{s}'_{12} \boldsymbol{\omega}_{12} + (s_{22} + \lambda) \omega_{22} \right\} \right]$$

where  $D = \text{diag}(\mathbf{v}_{12})$ . Then, changing variables from  $(\boldsymbol{\omega}_{1,2}, \omega_{2,2})$  to  $(\mathbf{u} = \boldsymbol{\omega}_{1,2}, v = \omega_{2,2} - \boldsymbol{\omega}'_{1,2} \mathbf{\Omega}^{-1} \boldsymbol{\omega}_{1,2})$  we have full conditionals

$$\mathbf{u} | \cdot \sim N(-\mathbf{C} \mathbf{s}_{1,2}, \mathbf{C}) \text{ and } v | \cdot \sim \text{Gamma} \left( \frac{n}{2} + 1, \frac{s_{2,2} + \lambda}{2} \right),$$

where  $\mathbf{C} = \{(s_{2,2} + \lambda) \mathbf{\Omega}_{1,1}^{-1} + \text{diag}(\mathbf{v}_{1,2}^{-1})\}^{-1}$ . Using this method, we can permute any column to attain the full conditional used to generate  $\mathbf{\Omega}_{sk} | \mathbf{G}_{sk}, \mathbf{X}_{sk}$ .

**Updating  $\mathbf{G}_{sk}$ :** Our full conditional on  $\mathbf{G}_{sk}$  is then an independent Bernoulli of the form

$$P(g_{skij} = 1 | \mathbf{\Omega}_{sk}, \mathbf{X}_{sk}) = \frac{N(\omega_{skij} | 0, \nu_1^2) \pi}{N(\omega_{skij} | 0, \nu_1^2) \pi + N(\omega_{skij} | 0, \nu_0^2) (1 - \pi)}$$

where  $\frac{\pi}{1-\pi}$  is determined by the MRF prior on the graph structure such that

$$\frac{\pi}{1-\pi} = \frac{P(\mathbf{G}'_{sk} | \nu_{sij}, \boldsymbol{\Theta}_s, \{\mathbf{G}_{sm}\}_{m \neq k})}{P(\mathbf{G}_{sk} | \nu_{sij}, \boldsymbol{\Theta}_s, \{\mathbf{G}_{sm}\}_{m \neq k})} = \exp \left\{ -(\nu_{sij} + 2 \sum_{m \neq k} \theta_{skm} g_{smij}) \right\}$$

for proposed new graph  $\mathbf{G}'_{sk}$  which differs from the current graph  $\mathbf{G}_{sk}$  in that only edge  $(i, j)$  is excluded from  $\mathbf{G}'_{sk}$  and included in  $\mathbf{G}_{sk}$ .

**Updating  $\nu_{sij}$ :** Given the terms in the joint prior on graphs  $\mathbf{G}_{s1}, \dots, \mathbf{G}_{sK}$  including  $\nu_{sij}$  we have

$$\begin{aligned} P(\mathbf{G}_{s1}, \dots, \mathbf{G}_{sK} | \nu_{sij}, \boldsymbol{\Theta}_s) &= \prod_{i < j} C(\nu_{sij}, \boldsymbol{\Theta}_s)^{-1} \exp(\nu_{sij} \mathbf{1}^T \mathbf{g}_{sij} + \mathbf{g}_{sij}^T \boldsymbol{\Theta}_s \mathbf{g}_{sij}) \\ &\propto C(\nu_{sij}, \boldsymbol{\Theta}_s)^{-1} \exp(\nu_{sij} \mathbf{1}^T \mathbf{g}_{sij}) \end{aligned}$$

Then we can find the posterior full conditional

$$P(\nu_{sij} | \cdot) \propto P(\nu_{sij}) P(\Psi | X) \propto \frac{\exp(\nu_{sij} (a + \mathbf{1}^T \mathbf{g}_{sij}))}{C(\nu_{sij}, \boldsymbol{\Theta}_s) (1 + e^{\nu_{sij}})^{a+b}}$$

For each  $(i, j)$  pair in  $1 \leq i < j \leq p$ , we then propose a value  $q^*$  from the density  $\text{Beta}(a^*, b^*)$  and set  $\nu^* = \text{logit}(q^*)$ . Then the proposal density can be written in terms of  $\nu^*$  as

$$q(\nu^*) = \frac{1}{B(a^*, b^*)} \frac{e^{a^* \nu^*}}{(1 + e^{\nu^*})^{a^* + b^*}}$$

Our Metropolis-Hastings ratio in the MCMC is then

$$r = \frac{P(\nu^* | \cdot) q(\nu_{sij})}{P(\nu_{sij} | \cdot) q(\nu^*)} = \frac{\exp[(\nu^* - \nu_{sij})(a - a^* + \mathbf{1}^T \mathbf{g}_{sij})] C(\nu_{sij}, \Theta_s) (1 + e^{\nu_{sij}})^{a+b-a^*-b^*}}{C(\nu^*, \Theta_s) (1 + e^{\nu^*})^{a+b-a^*-b^*}}$$

**Updating  $\theta_{skm}$  and  $\gamma_{skm}$ :** We sample  $\theta_{skm}$  and  $\gamma_{skm}$  from their joint posterior full conditional distribution. The terms in the joint prior on graphs  $\mathbf{G}_{s1}, \dots, \mathbf{G}_{sK}$  including  $\theta_{km}$  are

$$\begin{aligned} P(\mathbf{G}_{s1}, \dots, \mathbf{G}_{sK} | \nu_{sij}, \Theta_s) &= \prod_{i < j} C(\nu_{sij}, \Theta_s)^{-1} \exp(\nu_{sij} \mathbf{1}^T \mathbf{g}_{sij} + \mathbf{g}_{sij}^T \Theta_s \mathbf{g}_{sij}) \\ &\propto \prod_{i < j} C(\nu_{sij}, \Theta_s)^{-1} \exp(2\theta_{skm} g_{skij} g_{smij}) \end{aligned}$$

Given the prior on  $\theta_{skm}$  and  $\gamma_{skm}$ , the posterior full conditional of  $\theta_{skm}$  and  $\gamma_{skm}$  can be written

$$\begin{aligned} P(\theta_{skm}, \gamma_{skm} | \cdot) &\propto P(\mathbf{G}_{s1}, \dots, \mathbf{G}_{sK} | \nu_{sij}, \Theta_s) P(\theta_{skm} | \gamma_{skm}) P(\gamma_{skm} | \{\gamma_{tkm}\}_{s \neq t}, w_{km}, \Phi) \\ &\propto \left[ \prod_{i < j} C(\nu_{sij}, \Theta_s)^{-1} \exp(2\theta_{skm} g_{skij} g_{smij}) \right] \times \left[ (1 - \gamma_{km}) \delta_0 + \gamma_{km} \frac{\beta^\alpha}{\Gamma(\alpha)} \theta_{skm}^{\alpha-1} e^{-\beta \theta_{skm}} \right] \\ &\quad \times \frac{\exp(\gamma_{skm} (w_{km} + 2 \sum_{s \neq t} \phi_{st} \gamma_{tkm}))}{1 + \exp(w_{km} + 2 \sum_{s \neq t} \phi_{st} \gamma_{tkm})} \end{aligned}$$

Since the normalizing constant for the above mixture is analytically intractable, we use Metropolis-Hastings steps which sample  $\theta_{skm}$  and  $\gamma_{km}$  for each pair  $(k, m)$  where  $1 \leq k < m \leq K$  from their joint posterior full conditional distribution. The construction for this step follows in the manner of the MCMC approach described in [Gottardo and Raftery \(2008\)](#) for sampling from mixtures of mutually singular distributions. Two steps are performed at each iteration: a between-model move and a within-model move. This type of sampler has been shown in the literature to be effectively equivalent to a reversible jump Markov chain Monte Carlo (RJMCMC):

• For the between-model move, if the sampler has current state  $\gamma_{skm} = 1$ , we propose  $\gamma_{skm}^* = 0$  and  $\theta_{skm}^* = 0$ . Otherwise, if in the current state  $\gamma_{skm} = 0$ , we propose  $\gamma_{skm}^* = 1$  and sample  $\theta_{skm}^*$  from the proposal density  $q(\theta_{skm}^*) = \text{Gamma}(\theta_{skm}^* | \alpha^*, \beta^*)$ . The Metropolis-Hastings ratio is

$$r = \frac{P(\theta_{skm}^*, \gamma_{skm}^* | \cdot) q(\theta_{skm})}{P(\theta_{skm}, \gamma_{skm} | \cdot)} = \left[ \prod_{i < j} \frac{C(\nu_{sij}, \Theta_s) \exp(-2\theta_{skm} g_{skij} g_{smij})}{C(\nu_{sij}, \Theta_s^*)} \right] \frac{\beta^{\alpha^*} \Gamma(\alpha)}{\beta^\alpha \Gamma(\alpha^*)} \theta_{skm}^{\alpha^* - \alpha} \frac{\exp((\beta - \beta^*)\theta_{skm})}{\exp(w_{km} + 2 \sum_{s \neq t} \phi_{st} \gamma_{kmt})}$$

where  $\Theta_s^*$  represents matrix  $\Theta_s$  with entry  $\theta_{skm} = \theta_{skm}^*$ .

If in the current state  $\gamma_{skm} = 0$ , we propose  $\theta_{skm}^* = 1$  and sample  $\theta_{skm}^*$  from the proposal density specified before. When moving from  $\gamma_{skm} = 0$  to  $\gamma_{skm}^* = 1$ , the Metropolis-Hastings ratio is

$$r = \frac{P(\theta_{skm}^*, \gamma_{skm}^* | \cdot)}{P(\theta_{skm}, \gamma_{skm} | \cdot) q(\theta_{skm}^*)} = \left[ \prod_{i < j} \frac{C(\nu_{sij}, \Theta_s) \exp(2\theta_{skm}^* g_{skij} g_{smij})}{C(\nu_{sij}, \Theta_s^*)} \right] \frac{\beta^\alpha \Gamma(\alpha^*)}{\beta^{\alpha^*} \Gamma(\alpha)} \theta_{skm}^{* \alpha - \alpha^*} \exp((\beta^* - \beta)\theta_{skm}^*) \exp(w_{km} + 2 \sum_{s \neq t} \phi_{st} \gamma_{kmt})$$

• We then perform a within-model move when the value of  $\theta_{skm}$  sampled from the between-model move is 1. For this step, we propose a new value of  $\theta_{skm}$  using the same proposal density as before. The Metropolis-Hastings ratio for this step is

$$r = \frac{P(\theta_{skm}^*, \gamma_{skm}^* | \cdot) q(\theta_{skm})}{P(\theta_{skm}, \gamma_{skm} | \cdot) q(\theta_{skm}^*)} = \left[ \prod_{i < j} \frac{C(\nu_{sij}, \Theta_s) \exp(2(\theta_{skm}^* - \theta_{skm}) g_{skij} g_{smij})}{C(\nu_{sij}, \Theta_s^*)} \right] \left( \frac{\theta_{skm}^*}{\theta_{skm}} \right)^{\alpha - \alpha^*} \exp[(\beta^* - \beta)(\theta_{skm}^* - \theta_{skm})]$$

**Updating  $w_{km}$ :** Considering the terms of the joint prior on the vector  $\gamma_{km} = [\gamma_{1km}, \dots, \gamma_{Skm}]^T$  including  $w_{km}$  we attain

$$P(\gamma_{km} | w_{km}, \Phi) \propto C(w_{km}, \Phi)^{-1} \exp(w_{km} \mathbf{1}^T \gamma_{km})$$

Then we can find the posterior full conditional for  $w_{km}$

$$P(w_{km} | \cdot) \propto P(w_{km}) P(\Psi | \mathbf{X}) \propto \frac{\exp(dw_{km})}{(1 + e^{w_{km}})^{d+f}} C(w_{km}, \Phi)^{-1} \exp(w_{km} \mathbf{1}^T \gamma_{km}) \frac{\exp(w_{km}(d + \mathbf{1}^T \gamma_{km}))}{C(w_{km}, \Phi)(1 + e^{w_{km}})^{d+f}}$$

For each  $(k, m)$  pair in  $1 \leq k < m \leq K$ , we then propose a value  $q^{**}$  from the density  $\text{Beta}(d^*, f^*)$  and set  $w^* = \text{logit}(q^{**})$ . Then the proposal density can be written in terms of  $w^*$  as

$$q(w^*) = \frac{1}{B(d^*, f^*)} \frac{e^{d^* w^*}}{(1 + e^{w^*})^{d^* + f^*}}$$

Our Metropolis-Hastings ratio in the MCMC is then

$$r = \frac{P(w^*|\cdot)q(w_{km})}{P(w_{km}|\cdot)q(w^*)} = \frac{\exp(w^* - w(d - d^* + \mathbf{1}^T \gamma_{km}))C(w_{km}, \Phi)(1 + e^{w_{km}})^{d+f-d^*-f^*}}{C(w^*, \Phi)(1 + e^{w^*})^{d+f-d^*-f^*}}$$

**Updating  $\phi_{st}$  and  $\zeta_{st}$ :** Our sampler for  $\phi_{st}$  and  $\zeta_{st}$  is constructed in a parallel manner to that for  $\theta_{skm}$  and  $\gamma_{skm}$ . The terms in the joint prior on  $\gamma_{km}$  including  $\phi_{st}$  are

$$P(\Gamma_{km}|w_{km}, \Phi) \propto \prod_{k < m} C(w_{km}, \Phi)^{-1} \exp(2\phi_{st}\gamma_{skm}\gamma_{tkm})$$

Given the priors on  $\phi_{st}$  and  $\zeta_{st}$ , the posterior full conditional can then be written

$$\begin{aligned} P(\phi_{st}, \zeta_{st}|\cdot) &\propto P(\gamma_{km}|w_{km}, \Phi)P(\phi_{st}|\zeta_{st})P(\zeta_{st}) \\ &\propto \left[ \prod_{k < m} C(w_{km}, \Phi)^{-1} \exp(2\phi_{st}\gamma_{skm}\gamma_{tkm}) \right] \times \left[ (1 - \zeta_{st})\delta_1 + \zeta_{st} \frac{\kappa^\eta}{\Gamma(\eta)} \phi_{st}^{\eta-1} e^{-\kappa\phi_{st}} \right] \\ &\quad \times u^{\zeta_{st}} (1 - u)^{(1-\zeta_{st})} \end{aligned}$$

For the between-model move, if in the current state  $\zeta_{st} = 1$ , we propose  $\zeta_{st}^* = 0$  and  $\phi_{st}^* = 0$ . If in the current state  $\zeta_{st} = 0$ , we propose  $\zeta_{st}^* = 1$  and sample  $\phi_{st}^*$  from the proposal density  $q(\phi_{st}^*) = \text{Gamma}(\phi_{st}^*|\eta^*, \kappa^*)$ . When moving from  $\zeta_{st} = 1$  to  $\zeta_{st}^* = 0$ , the Metropolis Hastings ratio is

$$\begin{aligned} r &= \frac{P(\phi_{st}^*, \zeta_{st}^*|\cdot)q(\phi_{st})}{P(\phi_{st}, \zeta_{st}|\cdot)} \\ &= \frac{\Gamma(\eta)}{\Gamma(\eta^*)} \frac{\kappa^{\eta^*}}{\kappa^\eta} \phi_{st}^{\eta-\eta^*} e^{(\kappa-\kappa^*)\phi_{st}} \left[ \prod_{k < m} \frac{C(w_{km}, \Phi) \exp(-2\phi_{st}\gamma_{skm}\gamma_{tkm})}{C(w_{km}, \Phi^*)} \right] \frac{(1-u)}{u} \end{aligned}$$

where  $\phi^*$  represents the matrix  $\phi$  with entry  $\phi_{st} = \phi_{st}^*$ . When moving from  $\zeta_{st} = 0$  to  $\zeta_{st}^* = 1$ , the Metropolis-Hastings ratio is

$$\begin{aligned} r &= \frac{P(\phi_{st}^*, \zeta_{st}^*|\cdot)}{P(\phi_{st}, \zeta_{st}|\cdot)q(\phi_{st}^*)} \\ &= \frac{\Gamma(\eta^*)}{\Gamma(\eta)} \frac{\kappa^\eta}{\kappa^{\eta^*}} \phi_{st}^{(\eta-\eta^*)} e^{(\kappa^*-\kappa)\phi_{st}^*} \left[ \prod_{k < m} \frac{C(w_{km}, \Phi) \exp(2\phi_{st}^*\gamma_{skm}\gamma_{tkm})}{C(w_{km}, \Phi^*)} \right] \frac{u}{(1-u)} \end{aligned}$$

We then perform our within-model move when the value of  $\zeta_{st}$  sampled from the between-model move is

1. For this step, we propose a new value of  $\phi_{st}$  using the same proposal density as before. Our Metropolis-Hastings ratio step is then

$$r = \frac{P(\phi_{st}^*, \zeta_{st}^* | \cdot) q(\phi_{st})}{P(\phi_{st}, \zeta_{st} | \cdot) q(\phi_{st}^*)}$$

$$= \left[ \prod_{k < m} \frac{C(w_{st}, \Phi) \exp(2(\phi_{st}^* - \phi_{st}) \gamma_{skm} \gamma_{tkm})}{C(w_{st}, \Phi^*)} \right] \left( \frac{\phi_{st}^*}{\phi_{st}} \right)^{\eta - \eta^*} \exp[(\kappa^* - \kappa)(\phi_{st}^* - \phi_{st})]$$

### *Appendix B: Case Study - Metabolite Selection*

After matching our metabolite data to lipid and aqueous annotation files, we were able to extract KEGG IDs for each sample, yet were left with up to 67 metabolites matching to a single KEGG ID. Consequently, in order to reduce high correlation between covariates and improve interpretation of results, we selected a subset of less correlated covariates using a principal component analysis (PCA) procedure outlined below.

For example purposes, we provide sample code online generating correlated normal data for 20 subjects, using the Cholesky decomposition of the correlation matrix from a subset of 15 metabolites from the Regulation of Autophagy pathway which all matched to KEGG ID “C01194”. The steps for our selection procedure are as follows:

1. Read in data with variables as rows, observations as columns
2. Center and standardize data
3. Perform principal component analysis
4. Compute percent of variance contributed by each component
5. While first component explains less than 98%
  - a) Remove the least correlated variable into a `Removed` subset
  - b) Repeat Steps 2-4

6. Return the remaining `Selected` subset and the `Removed` subset, where `Selected` consists of more correlated variables, the first of which explains at least 98% of variance in PCA for the “Selected” subset
7. Repeat steps 1-6 with the `Removed` subset until no variables are remaining

After this procedure, the first variable for each iteration’s `Selected` subset is collapsed into a dataset for analysis. From the online example, the 15 correlated variables were collapsed into a subset of 7 less correlated variables for analysis after carrying out the procedure.

### Appendix C: Case Study - Extended Hub Listings

Extended hub results for Regulation of Autophagy gene and metabolite platforms are given in tables 1 and 2, respectively, and those for FcγR-mediated phagocytosis in tables 3, 4, and 5.

## APPENDIX D: CASE STUDY ON COPD DISEASE SEVERITY

### *FcγR*

Estimated graphs for control, moderate, and severe subgroups for the Fcγ R-mediated phagocytosis (FcγR) pathway, obtained by selecting edges with MPPs greater than 0.5, are reported in Figures 1-2.

For the FcγR pathway, relative network similarities across subgroups, for the two platforms, were estimated as

$$MPP(\Theta)_{FcyR}^{Genes} = \begin{pmatrix} \cdot & 1.000 & 1.000 \\ & \cdot & 1.000 \\ & & \cdot \end{pmatrix} \quad MPP(\Theta)_{FcyR}^{Metabolites} = \begin{pmatrix} \cdot & .9547 & .9672 \\ & \cdot & .9499 \\ & & \cdot \end{pmatrix}$$

with relative similarity across platforms estimated as  $MPP(\Phi)_{FcyR} = .9772$

Table 1. **Degree results for RegAuto Gene pathway:** Hub results for each compound in the pathway, as well as average, minimum, median, and maximum degree per node computed across all compound values for each disease subgroup. Hub nodes are those with degree  $\geq 4$  and genes involved in known protein protein interactions are denoted in **bold**.

| Node Number    | Compound                 | Degree G1 | Degree G2 | Degree G3 |
|----------------|--------------------------|-----------|-----------|-----------|
| 1              | ULK3-225067_at           | 2         | 5         | 2         |
| 2              | <b>ATG3-221492.s.at</b>  | 8         | 10        | 1         |
| 3              | DRAM2-225228_at          | 4         | 9         | 3         |
| 4              | ATG4D-226871_s.at        | 9         | 6         | 0         |
| 5              | <b>ATG14-204568.at</b>   | 6         | 2         | 6         |
| 6              | ATG16L2-229389_at        | 3         | 6         | 6         |
| 7              | DRAM1-218627_at          | 5         | 10        | 1         |
| 8              | <b>ATG5-202512.s.at</b>  | 4         | 8         | 7         |
| 9              | ATG2A-213300_at          | 11        | 5         | 3         |
| 10             | <b>ULK2-204063.s.at</b>  | 7         | 9         | 7         |
| 11             | ATG13-203364_s.at        | 6         | 2         | 0         |
| 12             | <b>ATG4B-204903.x.at</b> | 4         | 3         | 4         |
| 13             | ATG9A-202492_at          | 4         | 0         | 0         |
| 14             | <b>ATG4A-213115.at</b>   | 1         | 8         | 2         |
| 15             | EPG5-227638_at           | 3         | 7         | 4         |
| 16             | <b>ATG101-218214.at</b>  | 5         | 5         | 2         |
| 17             | ATG2B-226684_at          | 4         | 4         | 7         |
| 18             | <b>BECN1-208946.s.at</b> | 7         | 5         | 4         |
| 19             | <b>ATG10-223677.at</b>   | 2         | 8         | 1         |
| 20             | <b>ATG12-213026.at</b>   | 3         | 2         | 0         |
| <b>Average</b> |                          | 4.9       | 5.7       | 3         |
| <b>Median</b>  |                          | 4         | 5.5       | 2.5       |
| <b>Min</b>     |                          | 1         | 0         | 0         |
| <b>Max</b>     |                          | 11        | 10        | 7         |

#### *Distributions of Network and Platform Relatedness Parameters*

To illustrate variability of network and platform relatedness parameters, posterior distribution histograms of non-zero values of  $\Theta_S$  and  $\Phi$  for the Regulation of Autophagy pathway are shown in Figures 3-5.

#### *Biological Background for Pathways*

*Autophagy pathway* When inspecting the hub listing, Autophagy related genes (ATG) typically showed decreased connectivity with severity (ATG2A, ATG3, ATG4D, ATG9A, ATG12, ATG13, ATG101) but

Table 2. **Degree results for Reg Auto Metabolite pathway:** Hub results for each compound in the pathway, as well as average, minimum, median, and maximum degree per node computed across all compound values for each disease subgroup. Hub nodes are those with degree  $\geq 4$

| Node Number    | Compound                      | Degree G1 | Degree G2 | Degree G3 |
|----------------|-------------------------------|-----------|-----------|-----------|
| 1              | PI(44:6)                      | 4         | 2         | 3         |
| 2              | 1-Phosphatidyl-D-myo-inositol | 2         | 1         | 4         |
| 3              | PI(34:4)                      | 5         | 3         | 3         |
| 4              | PI(0-42:1)                    | 1         | 0         | 2         |
| 5              | PI(38:6)                      | 4         | 3         | 5         |
| 6              | PI(33:0)                      | 1         | 2         | 1         |
| 7              | PI(37:1)                      | 4         | 5         | 4         |
| 8              | PI(36:2)                      | 3         | 7         | 5         |
| 9              | PI(20:4)                      | 0         | 3         | 3         |
| 10             | PI(40:8)                      | 3         | 4         | 2         |
| 11             | PE(33:0)                      | 1         | 1         | 3         |
| 12             | PE(41:7)                      | 4         | 5         | 3         |
| 13             | PE(34:2)                      | 4         | 4         | 2         |
| 14             | PE(20:0)                      | 4         | 2         | 2         |
| 15             | PE(41:5)                      | 4         | 5         | 4         |
| 16             | PE(P-36:4)                    | 2         | 4         | 4         |
| 17             | PE(P-40:5)                    | 1         | 1         | 3         |
| 18             | PE(P-38:5)                    | 1         | 1         | 2         |
| 19             | PE(42:8)                      | 4         | 4         | 3         |
| 20             | PE(P-38:6)                    | 3         | 2         | 3         |
| 21             | PE(P-36:1)                    | 1         | 1         | 1         |
| <b>Average</b> |                               | 2.67      | 2.86      | 2.95      |
| <b>Median</b>  |                               | 3         | 3         | 3         |
| <b>Min</b>     |                               | 0         | 0         | 1         |
| <b>Max</b>     |                               | 5         | 7         | 5         |

a few showed increased connectivity (ATG2B, ATG5, ATG16L2). In addition, BECN1 also showed decreased connectivity with severity. There were also known protein-protein interactions ([Radoshevich and others, 2010](#); [Qiu and others, 2013](#); [Huttlin and others, 2017](#)) that were decreased with severity among these gene hubs (ATG3-ATG12, ATG3-BECN1). In general, there is elevated autophagy in response to cigarette smoke exposure and in lung specimens from COPD subjects ([Ryter and others, 2010](#); [Chen and others, 2008](#)), and this pathway may be a potential therapeutic target for lung disease ([Nakahira and Choi, 2013](#)).

Four metabolites stood out in the hub listing. Phosphatidylethanolamine (PE) (33:0) and PE(P-40:5)

Table 3. **Degree results for Fc $\gamma$ R Gene pathway:** Hub results for each compound in the pathway, as well as average, minimum, median, and maximum degree per node computed across all compound values for each disease subgroup. Hub nodes are those with degree  $\geq 4$  and genes involved in known protein protein interactions are denoted in **bold**. The remaining portion of the hub listing for this pathway is continued in Table 4

| Node Number | Compound                  | Degree G1 | Degree G2 | Degree G3 |
|-------------|---------------------------|-----------|-----------|-----------|
| 1           | PLA2G6-210647_x_at        | 18        | 10        | 13        |
| 2           | <b>LAT-209881_s_at</b>    | 20        | 21        | 18        |
| 3           | BIN1-202931_x_at          | 20        | 21        | 17        |
| 4           | <b>PAK1-230100_x_at</b>   | 11        | 27        | 10        |
| 5           | <b>ARPC5L-226915_s_at</b> | 16        | 11        | 13        |
| 6           | <b>HCK-208018_s_at</b>    | 12        | 23        | 17        |
| 7           | <b>AKT2-225471_s_at</b>   | 17        | 15        | 11        |
| 8           | <b>MAPK1-212271_at</b>    | 11        | 18        | 2         |
| 9           | <b>PIK3R1-212240_s_at</b> | 13        | 11        | 10        |
| 10          | <b>CRK-202225_at</b>      | 19        | 23        | 10        |
| 11          | <b>SYK-226068_at</b>      | 11        | 18        | 20        |
| 12          | <b>ASAP1-224791_at</b>    | 13        | 14        | 14        |
| 13          | <b>PLCG2-204613_at</b>    | 9         | 16        | 4         |
| 14          | <b>RAC1-208640_at</b>     | 11        | 3         | 4         |
| 15          | <b>ARPC3-208736_at</b>    | 13        | 8         | 5         |
| 16          | <b>MARCKS-225897_at</b>   | 20        | 21        | 17        |
| 17          | <b>PRKCA-213093_at</b>    | 9         | 8         | 6         |
| 18          | <b>FCGR2A-203561_at</b>   | 16        | 19        | 15        |
| 19          | <b>PIK3CB-212688_at</b>   | 18        | 14        | 21        |
| 20          | <b>ARPC5-211963_s_at</b>  | 19        | 11        | 3         |
| 21          | <b>MAP2K1-202670_at</b>   | 16        | 11        | 7         |
| 22          | <b>PIK3CG-239294_at</b>   | 8         | 16        | 9         |
| 23          | <b>ARPC1B-201954_at</b>   | 3         | 8         | 1         |
| 24          | <b>LYN-210754_s_at</b>    | 21        | 20        | 11        |
| 25          | MARCKSL1-200644_at        | 3         | 8         | 14        |
| 26          | PIP5K1B-205632_s_at       | 12        | 15        | 13        |
| 27          | <b>VASP-202205_at</b>     | 4         | 8         | 3         |
| 28          | <b>DOCK2-213160_at</b>    | 3         | 12        | 7         |
| 29          | <b>ARPC1A-200950_at</b>   | 19        | 14        | 12        |

were unaffected in controls and moderate COPD, but showed increased connectivity with other metabolites with severe COPD. Alternatively PE(20:0) and phosphatidylinositol (PI) (34:4) hub metabolites showed decreased connectivity from control to moderate COPD, but remained constant from moderate to severe COPD. The edges were then explored for connectivity and disruption. Six metabolite-metabolite connections stood out. PI(34:4)–PE(P-38:6), PE(20:0)–PE(42:8), and PI(40:8)–PE(20:0) were connected

Table 4. **Degree results for Fc $\gamma$ R Gene pathway Continued:** Hub results for each compound in the pathway, as well as average, minimum, median, and maximum degree per node computed across all compound values for each disease subgroup. Hub nodes are those with degree  $\geq 4$ , genes involved in known protein protein interactions are denoted in red.

| Node Number    | Compound                      | Degree G1 | Degree G2 | Degree G3 |
|----------------|-------------------------------|-----------|-----------|-----------|
| 30             | <b>PRKCD-202545_at</b>        | 21        | 21        | 24        |
| 31             | <b>PTPRC-212588_at</b>        | 5         | 13        | 1         |
| 32             | <b>ARF6-224788_at</b>         | 13        | 16        | 10        |
| 33             | <b>PIP5K1A-207391_s_at</b>    | 1         | 4         | 3         |
| 34             | <b>RPS6KB1-204171_at</b>      | 16        | 14        | 8         |
| 35             | <b>GSN-200696_s_at</b>        | 19        | 11        | 8         |
| 36             | <b>RAF1-201244_s_at</b>       | 1         | 2         | 0         |
| 37             | <b>PRKCB-209685_s_at</b>      | 6         | 3         | 0         |
| 38             | <b>WAS-38964_r_at</b>         | 4         | 1         | 1         |
| 39             | <b>CFL1-1555730_a_at</b>      | 12        | 17        | 13        |
| 40             | <b>RAC2-213603_s_at</b>       | 1         | 13        | 4         |
| 41             | <b>CDC42-208728_s_at</b>      | 1         | 4         | 0         |
| 42             | <b>INPP5D-203332_s_at</b>     | 28        | 22        | 18        |
| 43             | <b>LIMK1-204357_s_at</b>      | 8         | 8         | 2         |
| 44             | <b>VAV1-206219_s_at</b>       | 13        | 14        | 12        |
| 45             | <b>FCGR2B-210889_s_at</b>     | 12        | 3         | 6         |
| 46             | <b>ARPC4-217818_s_at</b>      | 11        | 15        | 11        |
| 47             | <b>WASF2-221725_at</b>        | 7         | 17        | 11        |
| 48             | <b>ARPC2-208679_s_at</b>      | 0         | 5         | 0         |
| 49             | <b>VAV3-218807_at</b>         | 4         | 16        | 9         |
| 50             | <b>AKT3-212607_at</b>         | 14        | 16        | 19        |
| 51             | <b>PIK3CA-204369_at</b>       | 15        | 5         | 10        |
| 52             | <b>LIMK2-202193_at</b>        | 9         | 12        | 6         |
| 53             | <b>PIK3CD-203879_at</b>       | 9         | 15        | 8         |
| 54             | <b>PIK3R5-220566_at</b>       | 13        | 14        | 13        |
| 55             | <b>PIP5K1C-212518_at</b>      | 14        | 7         | 4         |
| 56             | <b>AKT1-207163_s_at</b>       | 17        | 13        | 9         |
| 57             | <b>CRKL-212180_at</b>         | 14        | 23        | 16        |
| 58             | <b>ARPC4-TTL3-211672_s_at</b> | 11        | 18        | 15        |
| <b>Average</b> |                               | 11.79     | 13.21     | 9.45      |
| <b>Median</b>  |                               | 12        | 14        | 10        |
| <b>Min</b>     |                               | 0         | 1         | 0         |
| <b>Max</b>     |                               | 28        | 27        | 24        |

Table 5. **Degree results for Fc $\gamma$ R Metabolite pathway:** Hub results for each compound in the pathway, as well as average, minimum, median, and maximum degree per node computed across all compound values for each disease subgroup. Hub nodes are those with degree  $\geq 4$

| Node Number    | Compound                        | Degree G1 | Degree G2 | Degree G3 |
|----------------|---------------------------------|-----------|-----------|-----------|
| 1              | DG(35:6)                        | 6         | 3         | 3         |
| 2              | DG(38:9)                        | 1         | 2         | 1         |
| 3              | DG(36:3)                        | 4         | 3         | 4         |
| 4              | DG(43:4)                        | 2         | 3         | 2         |
| 5              | DG(36:2)                        | 4         | 4         | 7         |
| 6              | DG(39:3)                        | 1         | 2         | 1         |
| 7              | DG(39:2)                        | 4         | 5         | 3         |
| 8              | DG(33:3)                        | 0         | 2         | 0         |
| 9              | DG(46:0)                        | 6         | 3         | 5         |
| 10             | DG(36:6)                        | 4         | 3         | 1         |
| 11             | DG(0-34:1)                      | 4         | 2         | 7         |
| 12             | DG(36:0)-d5 (internal standard) | 4         | 5         | 3         |
| 13             | Arachidonic acid                | 1         | 1         | 4         |
| 14             | PA(24:0)                        | 3         | 3         | 2         |
| 15             | PA(0-28:0)                      | 2         | 3         | 4         |
| 16             | PA(0-34:1)                      | 1         | 3         | 2         |
| 17             | PA(P-30:0)                      | 5         | 2         | 4         |
| 18             | PA(P-20:0)                      | 4         | 3         | 4         |
| 19             | PA(0-38:4)                      | 4         | 3         | 1         |
| 20             | PA(42:2)                        | 5         | 7         | 4         |
| 21             | PA(28:0)                        | 3         | 2         | 3         |
| 22             | PA(15:0)                        | 1         | 0         | 1         |
| 23             | Sphingosine 1-phosphate         | 3         | 4         | 4         |
| <b>Average</b> |                                 | 3.13      | 2.96      | 3.04      |
| <b>Median</b>  |                                 | 4         | 3         | 3         |
| <b>Min</b>     |                                 | 0         | 0         | 0         |
| <b>Max</b>     |                                 | 6         | 7         | 7         |

in the control group but these interactions were disrupted in the moderate and severe subgroups. The PI(40:8)–PE(42:8) connectivity was absent in controls and present in the moderate and severe subgroups. Finally, PI(38:6)–PE(P-38:6) and PE(42:8)–PE(P-36:1) were only connected in the severe subgroup. These compounds are all glycerophospholipids. Glycerophospholipids are part of lung surfactant and have been reported to be perturbed in COPD ([Telenga and others, 2014](#)). The increase in connectivity or the disruption of connections may suggest the transition to alternate routes due to pathway compensation as a consequence of disease.

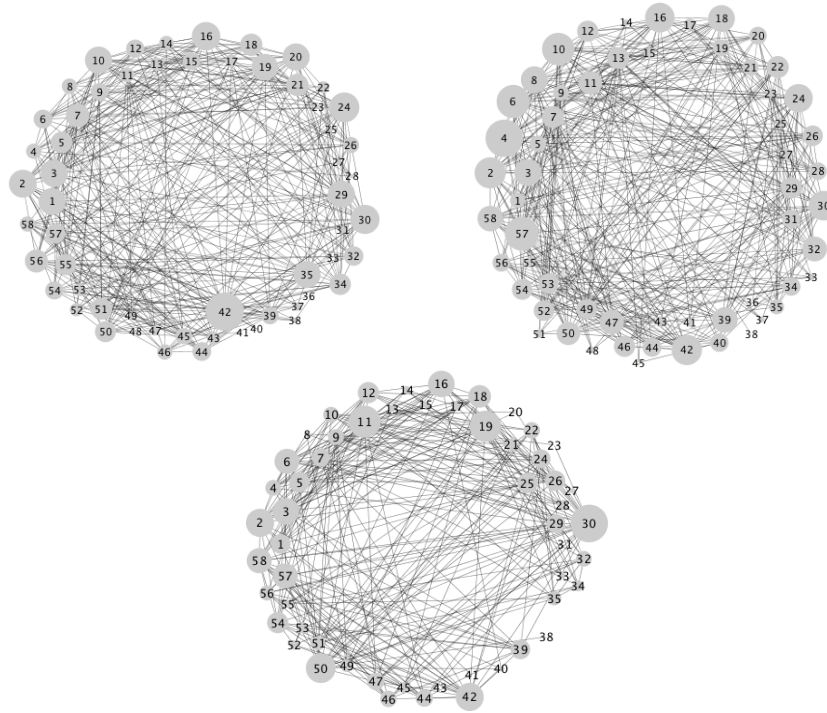

Fig. 1.  $\text{Fc}\gamma\text{R}$ -mediated phagocytosis ( $\text{Fc}\gamma\text{R}$ ) pathway, gene platform: Estimated graphs for control (top left), moderate (top right), and severe (bottom) subgroups, obtained by selecting edges with MPPs greater than 0.5. The size of the nodes is proportional to their degree.

*Fc $\gamma$ R-mediated phagocytosis pathway* In the  $\text{Fc}\gamma\text{R}$ -mediated phagocytosis pathway, two gene families stood out as important in the hub listing (AKT and PRKC). All three of the AKT family genes showed either decreased connectivity with COPD severity (AKT1, AKT2) or increased connectivity (AKT3). Phosphatase and tensin homolog (PTEN) is a regulator of the AKT signaling pathway, and genetic variation in PTEN is associated COPD ([Hosgood and others, 2009](#)). When selected edges with any of the AKT genes were explored for gene-gene interactions, many connections were broken in the moderate and severe subgroups of known protein-protein interactions to the AKT genes (AKT1-PIK3CA, AKT1-PIK3CB, AKT1-RPS6KB1, AKT2-PIK3CB, AKT1-AKT2). Many of these connections were with phosphoinositide-3-kinase (PI3K) genes. The PI3K pathway is activated by nicotine and plays a role in the pathology of COPD ([Medina-Tato and others, 2007](#)). Furthermore, there is evidence of miRNA targeting of PI3KCA transcripts that may contribute to initiation of COPD ([Shi and others, 2015](#)). The Protein Kinase C (PRKC)

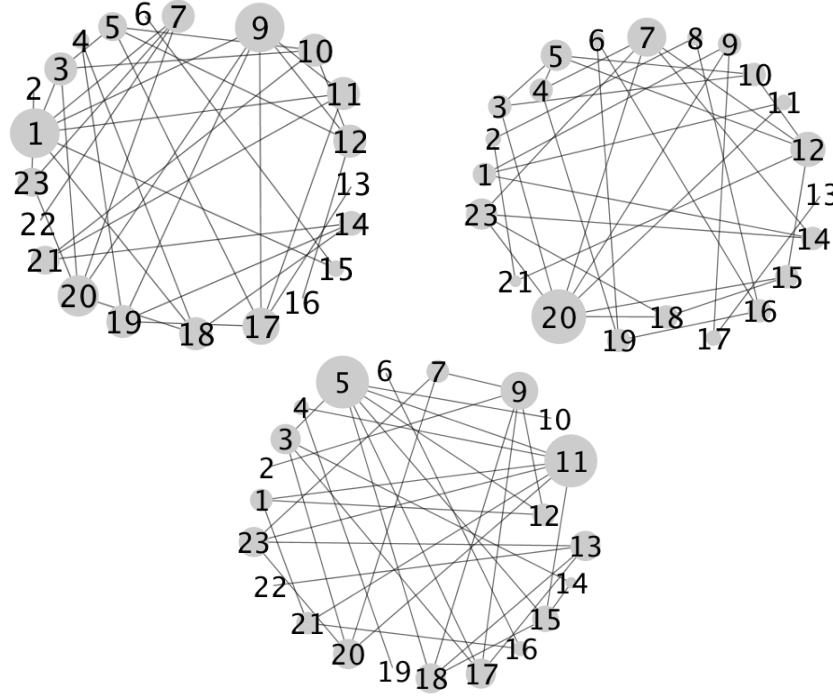

Fig. 2.  $\text{Fc}\gamma\text{R}$ -mediated phagocytosis ( $\text{Fc}\gamma\text{R}$ ) pathway, metabolite platform: Estimated graphs for control (top left), moderate (top right), and severe (bottom) subgroups, obtained by selecting edges with MPPs greater than 0.5. The size of the nodes is proportional to their degree.

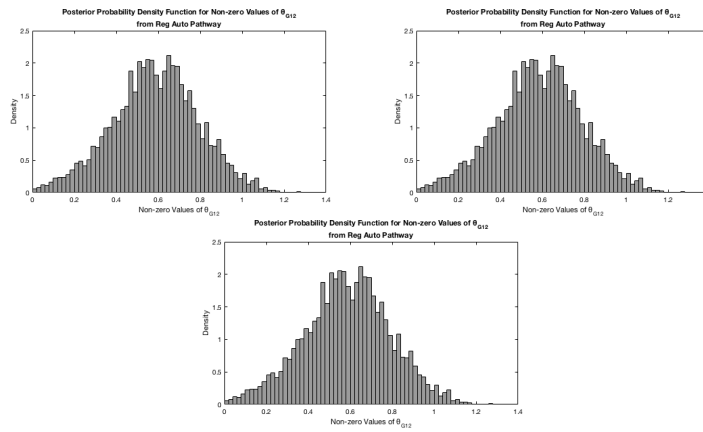

Fig. 3. Regulation of Autophagy (RegAuto) pathway, gene platform: posterior distributions of non-zero values for off-diagonal elements of  $\Theta$ , providing relative similarity of subgroups for the gene platform.

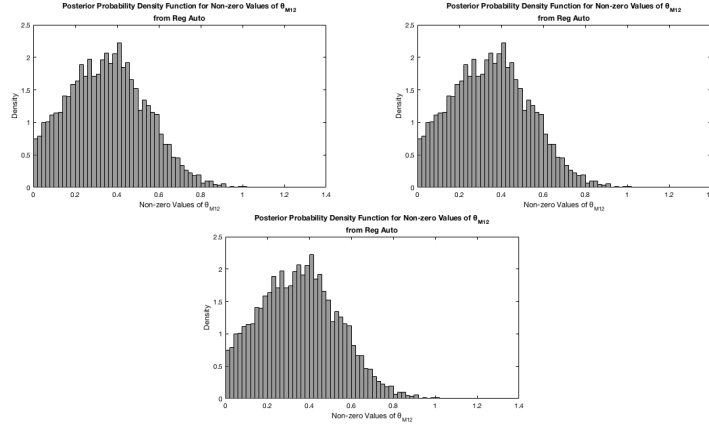

Fig. 4. Regulation of Autophagy (RegAuto) pathway, metabolite platform: posterior distributions of non-zero values for off-diagonal elements of  $\Theta$  providing relative similarity of subgroups for the metabolite platform

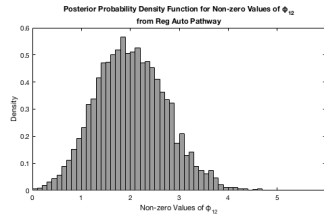

Fig. 5. Posterior distribution of non-zero values for  $\Phi_{12}$  providing relative similarity of platforms

family is the other gene family that showed either decreased connectivity with severity (PRKCA, PRKCB) or increased connectivity (PRKCD). PRKC isoenzymes are expressed in human lung and tracheal smooth muscle ([Webb and others, 1997](#)). Furthermore, PRKCA has increased expression in pulmonary artery smooth muscle cells of smokers with COPD compared to non-smokers ([Xaing and others, 2010](#)). There was one gene-gene interaction (PRKCA-PLCG2) with one of the PRKC genes that was disrupted in the more severe COPD groups and was a known protein-protein interaction ([Wang and others, 2006](#)).

Three metabolites stood out as important in the hub listing for the FC $\gamma$ R pathway. The hub metabolite diacylglycerol (DG) (35:6) showed decreased connectivity with disease severity, while the DG(36:2) and arachidonic acid hub metabolites showed increased connectivity with disease severity. When selected edges were explored for metabolite-metabolite interactions, many connections were broken in

the moderate and severe groups while connections, absent in the control and moderate subgroups, were present in the severe subgroup. Some notable examples include the following: the DG(46:0)–phosphatidic acid (PA) (42:2) interaction was disrupted with disease severity while the DG(36:3)–PA(42:2) was completely disrupted in the severe subgroup. The DG(38:9)–sphingosine-1-phosphate connection was only present in the control subgroup with no interactions in the moderate and severe group. Other notable interactions are DG(O-34:1)–sphingosone-1-phosphate, arachidonic acid–PA(P-20:0), arachidonic acid–PA(15:0), and arachidonic acid–sphingosine -1-phosphate; these connections were only present in the severe group. DGs are one of the constituents of pulmonary surfactant ([Lopez-Rodriguez and Perez-Gil, 2014](#)) and a disruption in surfactant is observed in COPD ([More and others, 2010](#)) and emphysema ([Cruickshank-Quinn and others, 2014, 2017](#)). Arachidonic acid is increased in COPD due to its production by inflammatory cells ([Barnes, 2016; Jamalkandi and others, 2015](#)) while sphingosine-1-phosphate accumulation in COPD is caused by cigarette smoke exposure ([Petrache and Petrusca, 2013](#)).

#### *Appendix E: Simulation - Sensitivity Analysis*

For sensitivity analysis, we generated data based on simulation setting one and  $p = 80$  and studied the impact on cross-group and cross-platform relative similarity across differing hyperparameter values. We first looked at sensitivity by varying  $u$ , the Bernoulli indicator of relatedness across platforms,  $\eta$  and  $\kappa$ , the hyperparameters on the gamma slab of the mixture prior on  $\Phi$ , while keeping the other parameters fixed as specified in the main paper. Resulting marginal posterior probability for  $\Theta$  and  $\Phi$  are given in Table 6. For platform one (the ‘gene’ platform), shared edge similarity for groups 1 and 2 was between 89% to 92% while for groups 1 and 3 it was around 23% and for groups 2 and 3 about 24%. For the second platform (the ‘metabolites’ platform), groups 1 and 2 and 1 and 3 shared approximately 91% and 90% of edges while groups 2 and 3 share approximately 81% of edges. Consequently, we determined that trial 1 from Table 6 resulted in relative similarity that was the most representative of our simulation set up, and therefore set  $u = .1$ ,  $\eta = 4$ , and  $\kappa = 5$  for future simulations and applications. Next, we looked at the

Table 6. Sensitivity Analysis: Inferred marginal posterior probability of  $\Theta$  and  $\Phi$  for varying  $u$ ,  $\eta$ , and  $\kappa$  values.

| Trial | $u$ | $\eta$ | $\kappa$ | $\theta_{G12}$ | $\theta_{G13}$ | $\theta_{G23}$ | $\theta_{M12}$ | $\theta_{M13}$ | $\theta_{M23}$ | $\Phi$ |
|-------|-----|--------|----------|----------------|----------------|----------------|----------------|----------------|----------------|--------|
| 1     | .1  | 4      | 5        | 1              | .513           | .5115          | 1              | 1              | .999           | .767   |
| 2     | .5  | 4      | 5        | 1              | .5585          | .5775          | 1              | 1              | 1              | .945   |
| 3     | .9  | 4      | 5        | 1              | .531           | .639           | 1              | 1              | .997           | .996   |
| 4     | .1  | 1      | 9        | 1              | .1405          | .1965          | 1              | 1              | .9965          | .151   |
| 5     | .1  | 4      | 9        | 1              | .2145          | .2385          | 1              | 1              | 1              | .4535  |
| 6     | .5  | 4      | 9        | 1              | .259           | .326           | 1              | 1              | 1              | .8115  |
| 7     | .5  | 1      | 9        | 1              | .151           | .182           | 1              | 1              | .9975          | .576   |

Table 7. Sensitivity Analysis: Inferred marginal posterior probability of  $\Theta$  and  $\Phi$  are given for varying  $\alpha$ ,  $\beta$ ,  $a$ , and  $b$ .

| Trial | $\alpha$ | $\beta$ | $a$ | $b$ | $\theta_{G12}$ | $\theta_{G13}$ | $\theta_{G23}$ | $\theta_{M12}$ | $\theta_{M13}$ | $\theta_{M23}$ | $\Phi$ |
|-------|----------|---------|-----|-----|----------------|----------------|----------------|----------------|----------------|----------------|--------|
| 1     | 1        | 9       | 1   | 19  | 1              | 1              | 1              | 1              | 1              | 1              | .9945  |
| 2     | 4        | 5       | 1   | 19  | 1              | 1              | 1              | 1              | 1              | 1              | .994   |
| 3     | 1        | 9       | 1   | 4   | .149           | .002           | .0045          | .1915          | .11            | .033           | .372   |
| 4     | 1        | 9       | 1   | 10  | 1              | .9545          | .9805          | 1              | 1              | 1              | .9845  |
| 5     | 1        | 9       | 1   | 6   | 1              | .139           | .148           | 1              | .9935          | .9685          | .5485  |
| 6     | 1        | 9       | 1   | 5   | .994           | .0425          | .0285          | .954           | .87            | .5495          | .461   |
| 7     | 1        | 9       | 1   | 7   | 1              | .51            | .5105          | 1              | 1              | .998           | .764   |
| 8     | 1        | 9       | 1   | 8   | 1              | .762           | .7995          | 1              | 1              | 1              | .903   |
| 9     | 1        | 9       | 2   | 7   | .776           | .014           | .008           | .7465          | .4435          | .1825          | .41    |
| 10    | 4        | 5       | 2   | 7   | .3675          | .077           | .0765          | .424           | .2625          | .178           | .3765  |

marginal posterior probability for  $\Theta$  and  $\Phi$  for different combinations of values for the hyperparameters  $\alpha$ ,  $\beta$ ,  $a$ , and  $b$ , keeping  $u$ ,  $\eta$  and  $\kappa$  as specified above. Results are given in Table 7. Based on those results, we determined to use Trial 7 values for our simulations and application, setting  $\alpha = 1$  and  $\beta = 9$  for the gamma slab portion of the mixture prior of cross group super graphs  $\Theta_s$ , and setting  $a = 1$ ,  $b = 7$  for the prior on the sparsity parameter of the MRF prior linking networks within each platform.

#### Appendix F: Simulations - Power Analysis

To analyze the improvement of power attained through joint inference from our method, we compared the true positive rates across all methods for fixed false positive rates of .10 and .05. Results are given in table 8. For lasso methods, true positive rates were acquired by selecting the similarity parameters

which resulted in maximum AUC for each simulation as reported in the manuscript and then varying the sparsity parameter to attain the TPR which corresponded to the FPR threshold. As expressed in the table, our method is able to acquire a higher TPR for both settings in the  $p = 80$  scenario, and in setting 2 of the  $p = 40$  scenario our method performs better than both the fused and hub lasso methods; the higher TPR achieved by our method in some scenarios shows our method has provided improvement in terms of statistical power.

#### *Appendix G: Case Study - Sensitivity Analysis*

*Graph Learning* To study impact of hyper parameter settings on graph learning, we analyzed sensitivity of inferred networks for the Regulation of Autophagy pathway with 20 unique genes and 21 metabolites. These networks are compared in terms of sparsity levels as well as overlap with reported results from our paper.

As seen in tables 9, 10, and 11, hyper parameter settings have very little impact on graph learning performance and inferred network structure remains fairly stable across varying settings. In contrast, varying hyper parameters can cause quite an impact on inferred marginal posterior probabilities for  $\Theta$  and  $\Phi$  parameters, however ordering is generally preserved even as magnitude changes, and as these parameters are interpretable primarily on a relative scale we selected the hyper parameter settings that seemed to best reflect the true similarity for our simulation settings which are of the same approximate size as our data.

*Relative Similarity Measures* Hyperparameter settings and relative Similarity Measures  $\Theta_S$  and  $\Phi$  are listed in tables 12, 13, 14 for all trials. As these parameters are relative measures, final hyper parameter settings were determined as those which reflected the true similarity for our simulation settings which were of approximate size to the data.

Table 8. Simulation study: In setting one, one group on one of the two platforms is dissimilar from the others. In setting two, both platforms have dissimilar groups. True positive rates are reported as Mean over 25 replicates for  $p = 80$  scenarios and 50 replicates for  $p = 40$  scenarios.

| <b>Setting one, <math>p = 40</math></b> |                  |                  |
|-----------------------------------------|------------------|------------------|
| <b>Method</b>                           | <b>FPR = .10</b> | <b>FPR = .05</b> |
| Fused Lasso                             | 0.843            | 0.779            |
| Group Lasso                             | 0.849            | 0.780            |
| Hub Group Lasso                         | 0.752            | 0.619            |
| Multi-Platform Bayes                    | 0.801            | 0.717            |

| <b>Setting two, <math>p = 40</math></b> |                  |                  |
|-----------------------------------------|------------------|------------------|
| <b>Method</b>                           | <b>FPR = .10</b> | <b>FPR = .05</b> |
| Fused Lasso                             | 0.757            | 0.675            |
| Group Lasso                             | 0.831            | 0.753            |
| Hub Group Lasso                         | 0.761            | 0.641            |
| Multi-Platform Bayes                    | 0.817            | 0.735            |

| <b>Setting one, <math>p = 80</math></b> |                  |                  |
|-----------------------------------------|------------------|------------------|
| <b>Method</b>                           | <b>FPR = .10</b> | <b>FPR = .05</b> |
| Fused Lasso                             | 0.926            | 0.680            |
| Group Lasso                             | 0.945            | 0.631            |
| Hub Group Lasso                         | 0.900            | 0.659            |
| Multi-Platform Bayes                    | 1.000            | 1.000            |

| <b>Setting two, <math>p = 80</math></b> |                  |                  |
|-----------------------------------------|------------------|------------------|
| <b>Method</b>                           | <b>FPR = .10</b> | <b>FPR = .05</b> |
| Fused Lasso                             | 0.804            | 0.621            |
| Group Lasso                             | 0.883            | 0.629            |
| Hub Group Lasso                         | 0.903            | 0.662            |
| Multi-Platform Bayes                    | 1.000            | 1.000            |

## REFERENCES

- BARNES, P.J. (2016). Inflammatory mechanisms in patients with chronic obstructive pulmonary disease. J Allergy Clin Immunol **138**(1), 16–27.
- CHEN, Z.H., KIM, H.P., SCIURBA, F.C., LEE, S.J., FEGHALI-BOSTWICK, C., STOLZ, D.B., DHIR, R., LANDRENEAU, R.J., SCHUCHERT, M.J., YOUSEM, S.A., NAKAHIRA, K., PILEWSKI, J.M.,

Table 9. Sensitivity Analysis to determine impact of graph learning from  $u$ , the Bernoulli prior on indicators of platform similarity, and  $\eta$  and  $\kappa$ , the hyper parameters influencing the Gamma slab portion of the mixture prior on  $\Phi$ . Comparison is reported as edge counts for subgroups within each platform for each trial as well as the count of matching indicators when comparing adjacency matrices of learned networks vs the reported networks for each subgroup. As gene networks consist of 20 variables and metabolite networks have 21 variables, maximum matching indicator counts are 400 and 441 respectively for gene and metabolite subgroups.

| Trial | Count Edges |     |    |    |    |    | Count Matching Indicators |     |     |     |     |     |
|-------|-------------|-----|----|----|----|----|---------------------------|-----|-----|-----|-----|-----|
|       | G1          | G2  | G3 | M1 | M2 | M3 | G1                        | G2  | G3  | M1  | M2  | M3  |
| 1     | 128         | 136 | 88 | 77 | 85 | 89 | 388                       | 386 | 386 | 441 | 437 | 439 |
| 2     | 122         | 134 | 84 | 79 | 83 | 91 | 392                       | 384 | 386 | 439 | 439 | 441 |
| 3     | 120         | 128 | 98 | 77 | 85 | 85 | 390                       | 386 | 384 | 441 | 437 | 435 |
| 4     | 112         | 126 | 82 | 75 | 83 | 93 | 386                       | 384 | 380 | 439 | 439 | 439 |
| 5     | 114         | 132 | 84 | 77 | 83 | 89 | 388                       | 386 | 382 | 441 | 439 | 435 |
| 6     | 122         | 132 | 86 | 77 | 85 | 89 | 388                       | 386 | 384 | 441 | 441 | 435 |
| 7     | 124         | 126 | 90 | 75 | 85 | 89 | 386                       | 388 | 384 | 439 | 437 | 439 |

Table 10. Sensitivity Analysis to determine impact of graph learning from  $\alpha$  and  $\beta$ , hyper parameters for the slab portion of the mixture prior on off-diagonal entries of  $\Theta_S$  linking sample groups within a platform, as well as  $a$  and  $b$ , the hyper parameters for the sparsity parameter of the MRF prior linking networks within each platform. Comparison is reported as edge counts for subgroups within each platform for each trial as well as the count of matching indicators when comparing adjacency matrices of learned networks vs the reported networks for each subgroup. As gene networks consist of 20 variables and metabolite networks have 21 variables, maximum matching indicator counts are 400 and 441 respectively for gene and metabolite subgroups. Trial 7 has hyper parameter settings equivalent to those reported in the document.

| Trial | Count Edges |     |    |    |    |    | Count Matching Indicators |     |     |     |     |     |
|-------|-------------|-----|----|----|----|----|---------------------------|-----|-----|-----|-----|-----|
|       | G1          | G2  | G3 | M1 | M2 | M3 | G1                        | G2  | G3  | M1  | M2  | M3  |
| 1     | 124         | 134 | 86 | 77 | 85 | 87 | 390                       | 384 | 392 | 441 | 441 | 437 |
| 2     | 124         | 138 | 90 | 81 | 85 | 89 | 394                       | 384 | 380 | 437 | 441 | 435 |
| 3     | 120         | 124 | 86 | 79 | 85 | 87 | 386                       | 386 | 392 | 435 | 441 | 437 |
| 4     | 122         | 136 | 90 | 81 | 85 | 85 | 388                       | 382 | 384 | 437 | 441 | 435 |
| 5     | 114         | 126 | 86 | 79 | 85 | 89 | 388                       | 384 | 388 | 439 | 441 | 435 |
| 6     | 120         | 132 | 80 | 75 | 85 | 89 | 386                       | 390 | 378 | 439 | 441 | 439 |
| 7     | 122         | 126 | 86 | 77 | 85 | 91 | 400                       | 400 | 400 | 441 | 441 | 441 |
| 8     | 124         | 130 | 90 | 79 | 85 | 89 | 390                       | 392 | 392 | 439 | 441 | 435 |
| 9     | 126         | 138 | 92 | 79 | 87 | 93 | 388                       | 384 | 382 | 439 | 439 | 439 |
| 10    | 130         | 142 | 94 | 83 | 85 | 95 | 384                       | 384 | 384 | 435 | 441 | 437 |

Table 11. Sensitivity Analysis to determine impact of graph learning from  $d$  and  $f$ , the hyper parameters for the sparsity parameter of the MRF prior linking platforms. Comparison is reported as edge counts for subgroups within each platform for each trial as well as the count of matching indicators when comparing adjacency matrices of learned networks vs the reported networks for each subgroup. As gene networks consist of 20 variables and metabolite networks have 21 variables, maximum matching indicator counts are 400 and 441 respectively for gene and metabolite subgroups.

| Trial | Count Edges |     |    |    |    |    | Count Matching Indicators |     |     |     |     |     |
|-------|-------------|-----|----|----|----|----|---------------------------|-----|-----|-----|-----|-----|
|       | G1          | G2  | G3 | M1 | M2 | M3 | G1                        | G2  | G3  | M1  | M2  | M3  |
| 1     | 122         | 128 | 92 | 75 | 87 | 89 | 384                       | 390 | 390 | 439 | 439 | 439 |
| 2     | 126         | 130 | 90 | 79 | 85 | 87 | 388                       | 388 | 388 | 439 | 441 | 437 |
| 3     | 122         | 130 | 90 | 79 | 85 | 93 | 388                       | 380 | 376 | 439 | 437 | 439 |

Table 12. Sensitivity Analysis: Inferred marginal posterior probability of  $\Theta$  and  $\Phi$  for varying  $u$ ,  $\eta$ , and  $\kappa$  values while holding constant  $\alpha = 1$ ,  $\beta = 9$ ,  $a = 1$ ,  $b = 7$ ,  $d = 1$ , and  $f = 19$ .

| Trial | u  | $\eta$ | $\kappa$ | $\theta_{G12}$ | $\theta_{G13}$ | $\theta_{G23}$ | $\theta_{M12}$ | $\theta_{M13}$ | $\theta_{M23}$ | $\Phi$ |
|-------|----|--------|----------|----------------|----------------|----------------|----------------|----------------|----------------|--------|
| 1     | .1 | 4      | 5        | .985           | .958           | .975           | .921           | .932           | .928           | .171   |
| 2     | .5 | 4      | 5        | .989           | .963           | .978           | .930           | .943           | .937           | .993   |
| 3     | .9 | 4      | 5        | .984           | .968           | .977           | .926           | .942           | .936           | .999   |
| 4     | .1 | 1      | 9        | .953           | .852           | .910           | .724           | .776           | .766           | .173   |
| 5     | .1 | 4      | 9        | .962           | .865           | .933           | .792           | .820           | .806           | .611   |
| 6     | .5 | 4      | 9        | .966           | .899           | .944           | .836           | .850           | .834           | .908   |
| 7     | .5 | 1      | 9        | .947           | .850           | .923           | .756           | .776           | .760           | .644   |

Table 13. Sensitivity Analysis: Inferred marginal posterior probability of  $\Theta$  and  $\Phi$  are given for varying  $\alpha$ ,  $\beta$ ,  $a$ , and  $b$  while holding constant  $u = .1$ ,  $\eta = 4$ ,  $\kappa = 5$ ,  $d = 1$ , and  $f = 19$ .

| Trial | $\alpha$ | $\beta$ | a | b  | $\theta_{G12}$ | $\theta_{G13}$ | $\theta_{G23}$ | $\theta_{M12}$ | $\theta_{M13}$ | $\theta_{M23}$ | $\Phi$ |
|-------|----------|---------|---|----|----------------|----------------|----------------|----------------|----------------|----------------|--------|
| 1     | 1        | 9       | 1 | 19 | .999           | .990           | .998           | .991           | .992           | .990           | .991   |
| 2     | 4        | 5       | 1 | 19 | .999           | .990           | .996           | .989           | .993           | .991           | .991   |
| 3     | 1        | 9       | 1 | 4  | .817           | .631           | .742           | .455           | .434           | .440           | .551   |
| 4     | 1        | 9       | 1 | 10 | .997           | .982           | .990           | .971           | .978           | .970           | .979   |
| 5     | 1        | 9       | 1 | 6  | .967           | .918           | .950           | .862           | .881           | .877           | .900   |
| 6     | 1        | 9       | 1 | 5  | .927           | .844           | .883           | .735           | .755           | .731           | .786   |
| 7     | 1        | 9       | 1 | 7  | .982           | .955           | .978           | .920           | .932           | .930           | .949   |
| 8     | 1        | 9       | 1 | 8  | .991           | .972           | .985           | .954           | .957           | .948           | .969   |
| 9     | 1        | 9       | 2 | 7  | .918           | .797           | .871           | .685           | .683           | .681           | .740   |
| 10    | 4        | 5       | 2 | 7  | .876           | .721           | .795           | .570           | .579           | .550           | .585   |

Table 14. Sensitivity Analysis: Inferred marginal posterior probability of  $\Theta$  and  $\Phi$  for varying  $d$  and  $f$  values while holding constant  $u = .1$ ,  $\eta = 4$ ,  $\kappa = 5$ ,  $\alpha = 1$ ,  $\beta = 9$ ,  $a = 1$ , and  $b = 7$ .

| Trial | $d$ | $f$ | $\theta_{G12}$ | $\theta_{G13}$ | $\theta_{G23}$ | $\theta_{M12}$ | $\theta_{M13}$ | $\theta_{M23}$ | $\Phi$ |
|-------|-----|-----|----------------|----------------|----------------|----------------|----------------|----------------|--------|
| 1     | 1   | 4   | .986           | .956           | .975           | .926           | .934           | .933           | .768   |
| 2     | 2   | 7   | .987           | .963           | .975           | .927           | .933           | .937           | .813   |
| 3     | 1   | 7   | .973           | .957           | .973           | .917           | .941           | .928           | .867   |

LEE, J.S., ZHANG, Y., RYTER, S.W. and others. (2008). Egr-1 regulates autophagy in cigarette smoke-induced chronic obstructive pulmonary disease. PLoS ONE **3**(10).

CRUICKSHANK-QUINN, C., MAHAFFEY, S., JUSTICE, M.J., HUGHES, G., ARMSTRONG, M., BOWLER, R.P., REISDORPH, R., PETRACHE, I. AND REISDORPH, N. (2014). Transient and persistent metabolomic changes in plasma following chronic cigarette smoke exposure in a mouse model. PLoS ONE **9**(7).

CRUICKSHANK-QUINN, C., POWELL, R., JACOBSON, S., KECHRIS, K., BOWLER, R.P., PETRACHE, I. AND REISDORPH, N. (2017). Metabolomic similarities between bronchoalveolar lavage fluid and plasma in humans and mice. Scientific Reports **7**(5108).

GOTTARDO, R. AND RAFTERY, A. (2008). Markov chain monte carlo with mixtures of mutually singular distributions. J. Comput. Graph. Stat. **17**(4), 949–975.

HOSGOOD, H. D., MENASHE, I., HE, X., CHANOCK, S. AND LAN, Q. (2009). Pten identified as important risk factor of chronic obstructive pulmonary disease. Respir Med **103**(2), 1866–1870.

HUTTLIN, E.L., BRUCKNER, R.J., PAULO, J.A., CANNON, J.R., TING, L., BALTIER, K., COLBY, G., GEBREAB, F., GYGI, M.P., PARZEN, H., TAM, J. SZPYT S., ZARRAGA, G., PONTANO-VAITES, L., SWARUP, S., WHITE, A.E., SCHWEPPE, D.K., RAD, R., ERICKSON, B.K., OBAR, R.A., GURUHARSHA, K.G., LI, K., ARTAVANIS-TSAKONAS, S., GYGI, S.P. and others. (2017). Architecture of the human interactome defines protein communities and disease networks. Nature **545**, 505–509.

- JAMALKANDI, S., MIRZAIE, M., JAFARI, M., MEHRANI, H., SHARIATI, P. AND KHODABANDEH, M. (2015). Signaling network of lipids as a comprehensive scaffold for omics data integration in the sputum of copd patients. Biochimica et biophysica acta **1851**(10), 1383–1393.
- LOPEZ-RODRIGUEZ, E. AND PEREZ-GIL, J. (2014). Structure-function relationships in pulmonary surfactant membranes: from biophysics to therapy. Biochimica et biophysica acta **1838**(6), 1568–1585.
- MEDINA-TATO, D.A., WARD, S.G. AND WATSON, M.L. (2007). Phosphoinositide 3-kinase signaling in lung disease: leucocytes and beyond. Immunology **121**(4), 448–461.
- MORE, J.M., VOELKER, D.R., SILVEIRA, L.J., EDWARDS, M.G., CHAN, E.D. AND BOWLER, R.P. (2010). Smoking reduces surfactant protein d and phospholipids in patients with and without chronic obstructive pulmonary disease. BMC Pulmonary Medicine **10**:53.
- NAKAHIRA, K. AND CHOI, A.M. (2013). Autophagy: a potential therapeutic target in lung diseases. Am J Physiol Lung Cell Mol Physiol **305**(2), L93–L107.
- PETRACHE, I. AND PETRUSCA, D.N. (2013). The involvement of sphingolipids in chronic obstructive pulmonary diseases. The Handbook of Experimental Pharmacology Handbook **216**, 247–264.
- QIU, Y., HOFMANN, K., COATS, J.E., SCHULMAN, B.A. AND KAISER, S.E. (2013). Binding to e1 and e3 is mutually exclusive for the human autophagy e2 atg3. Protein Sci. **22**, 1691–1697.
- RADOSHEVICH, L., MURROW, L., CHEN, N., FERNANDEZ, E., ROY, S., FUNG, C. AND DEBNATH, J. (2010). Atg12 conjugation to atg3 regulates mitochondrial homeostasis and cell death. Cell **142**, 590–600.
- RYTER, STEFAN W., LEE, SEON-JIN AND CHOI, AUGUSTINE M.K. (2010). Autophagy in cigarette smoke-induced chronic obstructive pulmonary disease. Expert Rev Respir Med **4**(5), 573–584.
- SHI, LIANG, XIN, Q., CHAI, R., LIU, L. AND MA, Z. (2015). Ectopic expressed mir-203 contributes

- to chronic obstructive pulmonary disease via targeting tak1 and pik3ca. Int J Clin Exp Pathol **8**(9), 10662–10670.
- TELENGA, E.D., HOFFMANN, R.F., T'KINDT RUBEN, HOONHORST, S.J., WILLEMSE, B.W., VAN OOSTERHOUT, A.J., HEIJINK, I.H., VAN DEN BERGE, M., JORGE, L., SANDRA, P., POSTMA, D.S., SANDRA, K. and others. (2014). Untargeted lipidomic analysis in chronic obstructive pulmonary disease. uncovering sphingolipids. Am J Respir Crit Care Med **190**(2), 155–164.
- WANG, H. (2015). Scaling it up: Stochastic search structure learning in graphical models. Bayesian Analysis **10**(2), 351–377.
- WANG, J., WANG, N., XIE, J., WALTON, S.C., MCKOWN, R.L., RAAB, R.W., MA, P., BECK, S.L., COFFMAN, G.L., HUSSAINI, I.M. and others. (2006). Restricted epithelial proliferation by lacritin via pkcalpha-dependent nfat and mtor pathways. J Cell Biol **174**, 689–700.
- WEBB, B.L., LINDSAY, M.A., SEYBOLD, J., BRAND, N.J., YACoub, M.H., HADDAD, E.B., BARNES, P.J., ADCOCK, I.M. AND GIEMBYCZ, M.A. (1997). Identification of the protein kinase c isoenzymes in human lung and airways smooth muscle at the protein and mrna level. Biochem Pharmacol **54**(1), 199–205.
- XAIING, M., LIU, X., ZENG, D., WANG, R. AND XU, Y. (2010). Changes of protein kinase calpha and cyclin d1 expressions in pulmonary arteries from smokers with and without chronic obstructive pulmonary disease. J Huazhong Univ Sci Technolog Med Sci **30**(2), 159–164.

*[Received August 1, 2010; revised October 1, 2010; accepted for publication November 1, 2010]*
